# Supplementary material for: The Impact of Producing Type and Dietary Crude Protein on Animal Performances and Microbiota Together with Greenhouse Gases Emissions in Growing Pigs
Source: MDPI journal article supplement (doi:10.3390/ani10101742), 2020-09-25
Supplement: s1 [file s1]

# Supplementary Materials: The Impact of Producing Type and Dietary Crude Protein on Animal Performances and Microbiota Together with Greenhouse Gases Emissions in Growing Pigs

Ahmad Reza Seradj, Joaquim Balcells \*, Laura Sarri, Lorenzo José Fraile and Gabriel de la Fuente Oliver

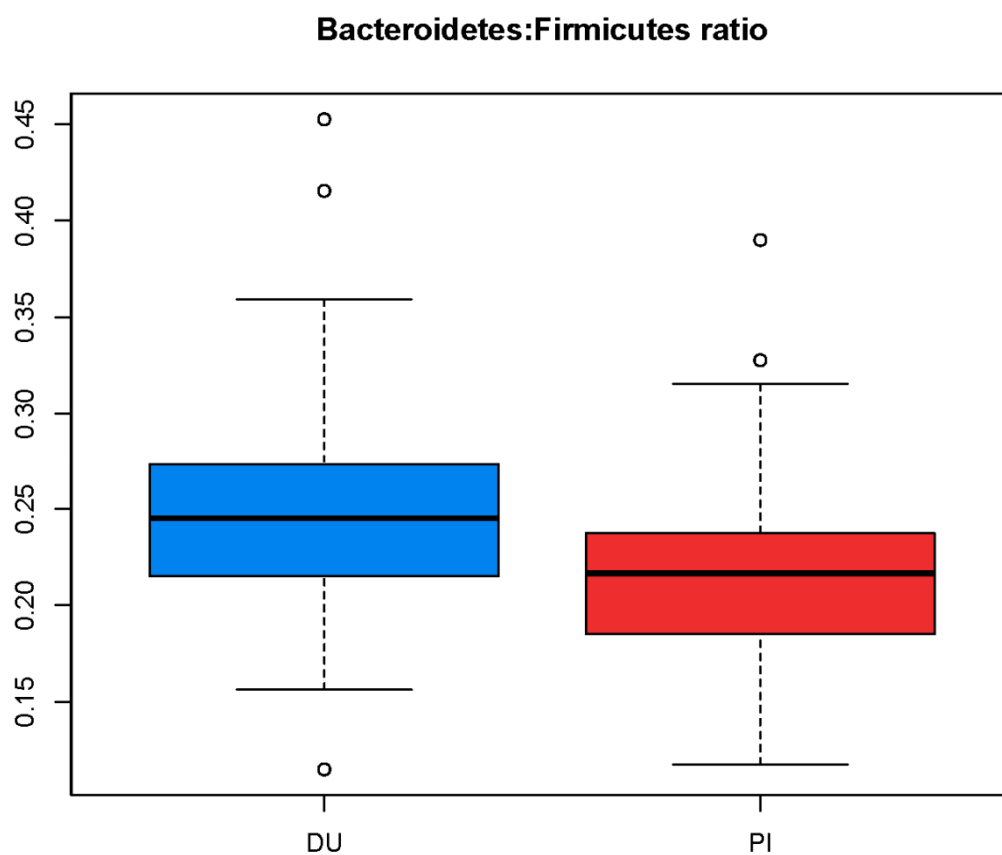

**Figure 1.** Bacteroidetes to firmicutes ratio in animals belonged to either Duroc (DU) or F2 (PI) producing type.

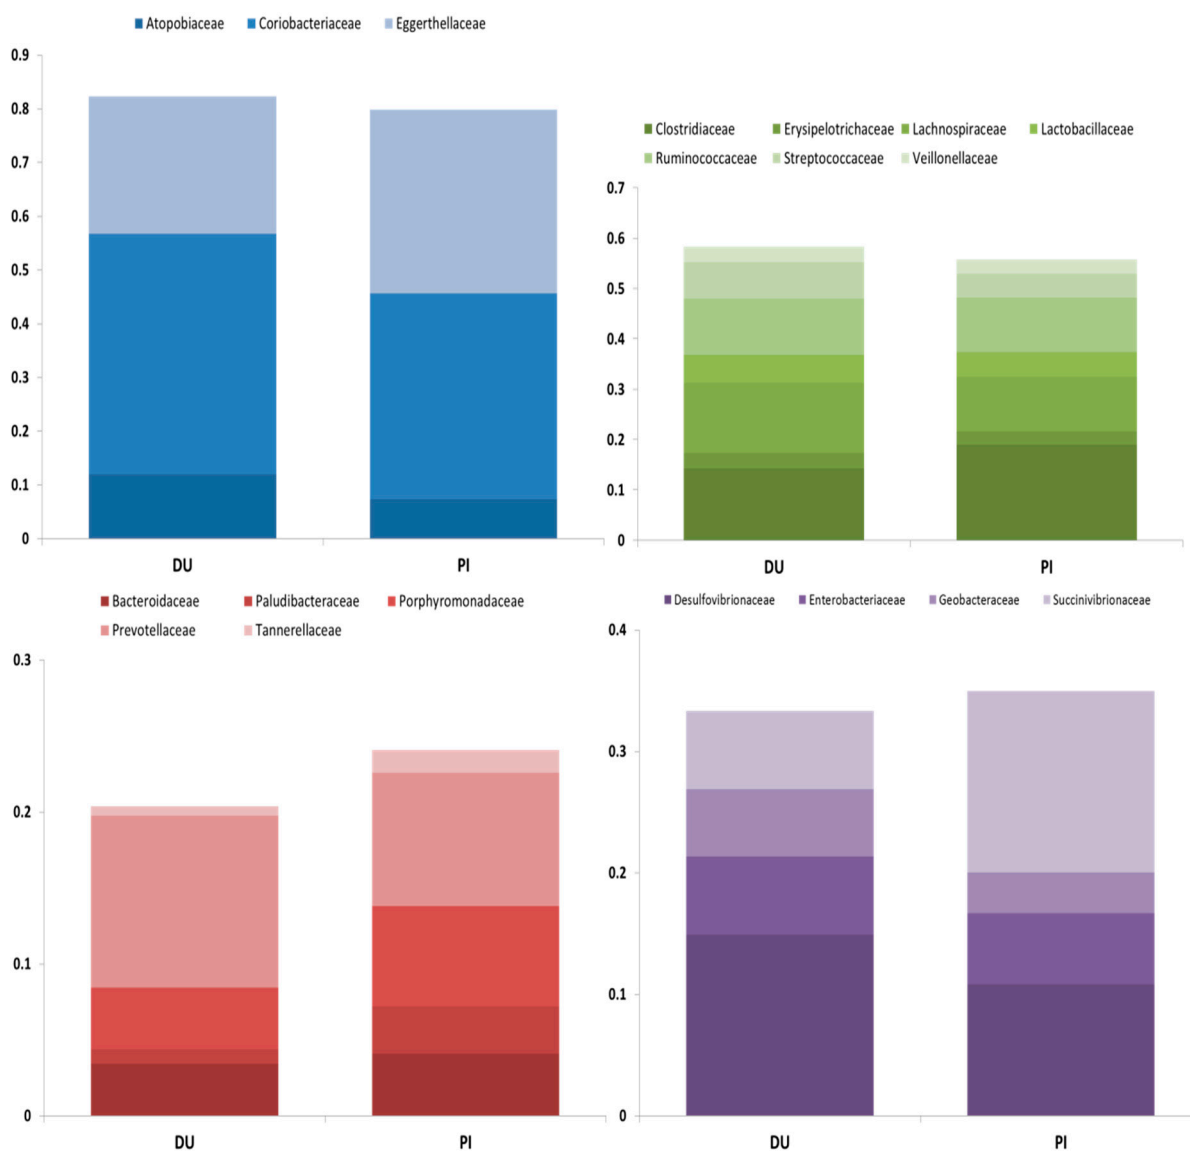

**Figure 2.** Distribution of families within the main phyla (*Actinobacteria* in blue, *Firmicutes* in green, *Bacteroidetes* in red and *Proteobacteria* in violet) presented in the fecal microbiota of the animals under the study, according to the producing type.

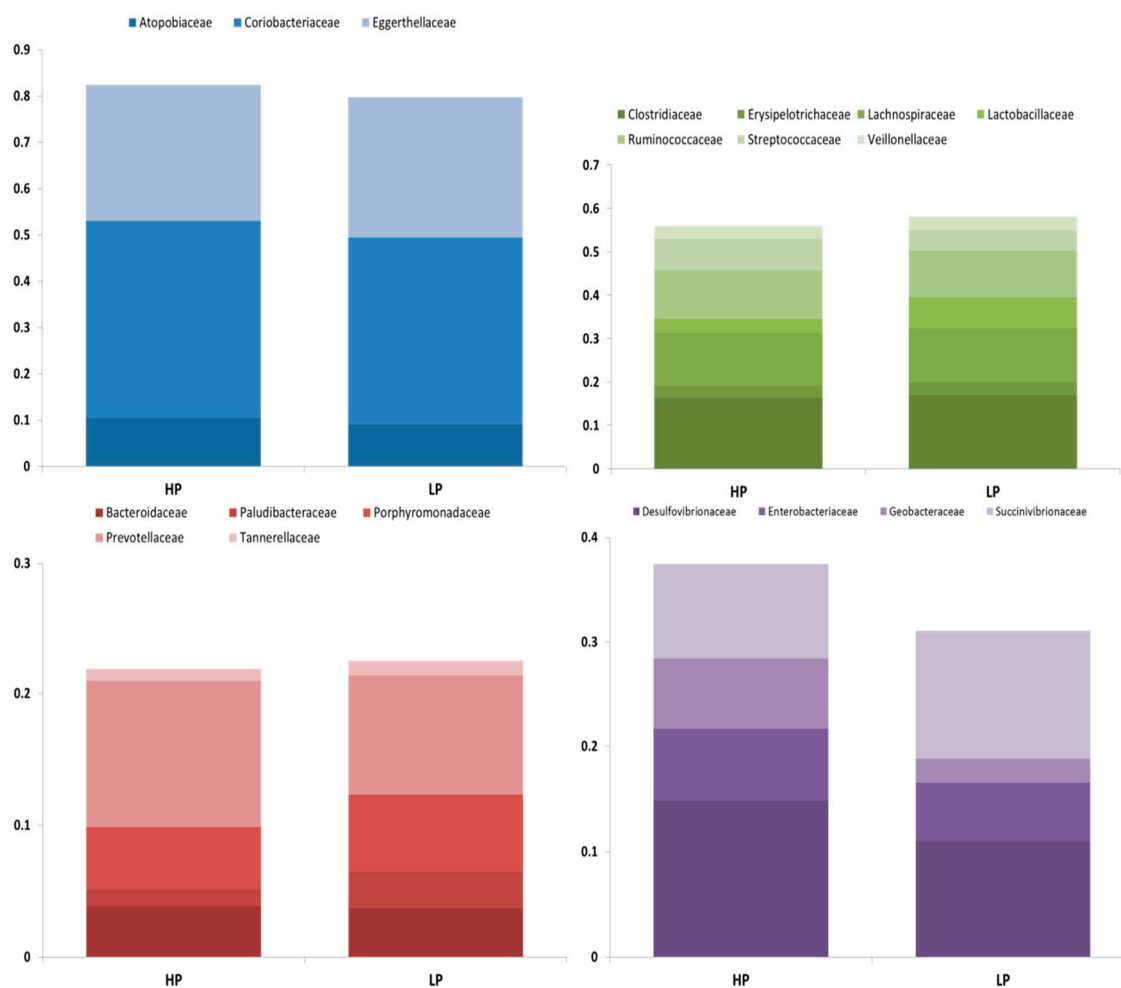

**Figure 3.** Distribution of families within the main phyla (*Actinobacteria* in blue, *Firmicutes* in green, *Bacteroidetes* in red, and *Proteobacteria* in violet) presented in the fecal microbiota of the animals under the study, according to the level of protein in the diet.

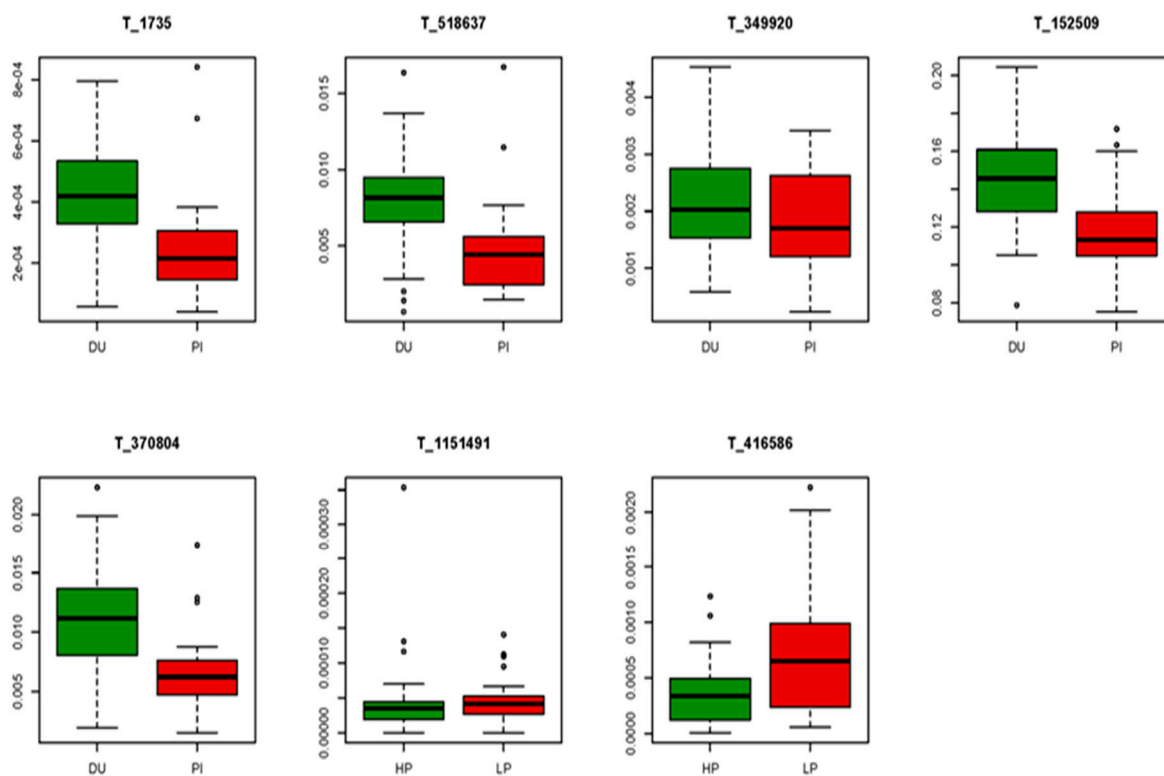

**Figure 4.** Main discriminative taxa found in the sPLS-DA, with abundance higher than 0.1% (T\_1735 = *[Eubacterium] bifforme*; T\_518637 = *Eubacterium bifforme* DSM 3989; T\_349920 = uncultured Coriobacteriales bacterium; T\_152509= uncultured Bacteroidetes bacterium; T\_370804= uncultured Prevotellaceae bacterium; T\_1151491= *Blautia* sp. canine oral taxon 143; T\_416586= *Selenomonas bovis*).
